# Supplementary material
Source: HighWire-hosted journal article supplement (https://jitc.bmj.com/content/8/2/e000844)
Supplement: inline-supplementary-material-4 [file inline-supplementary-material-4.pdf]

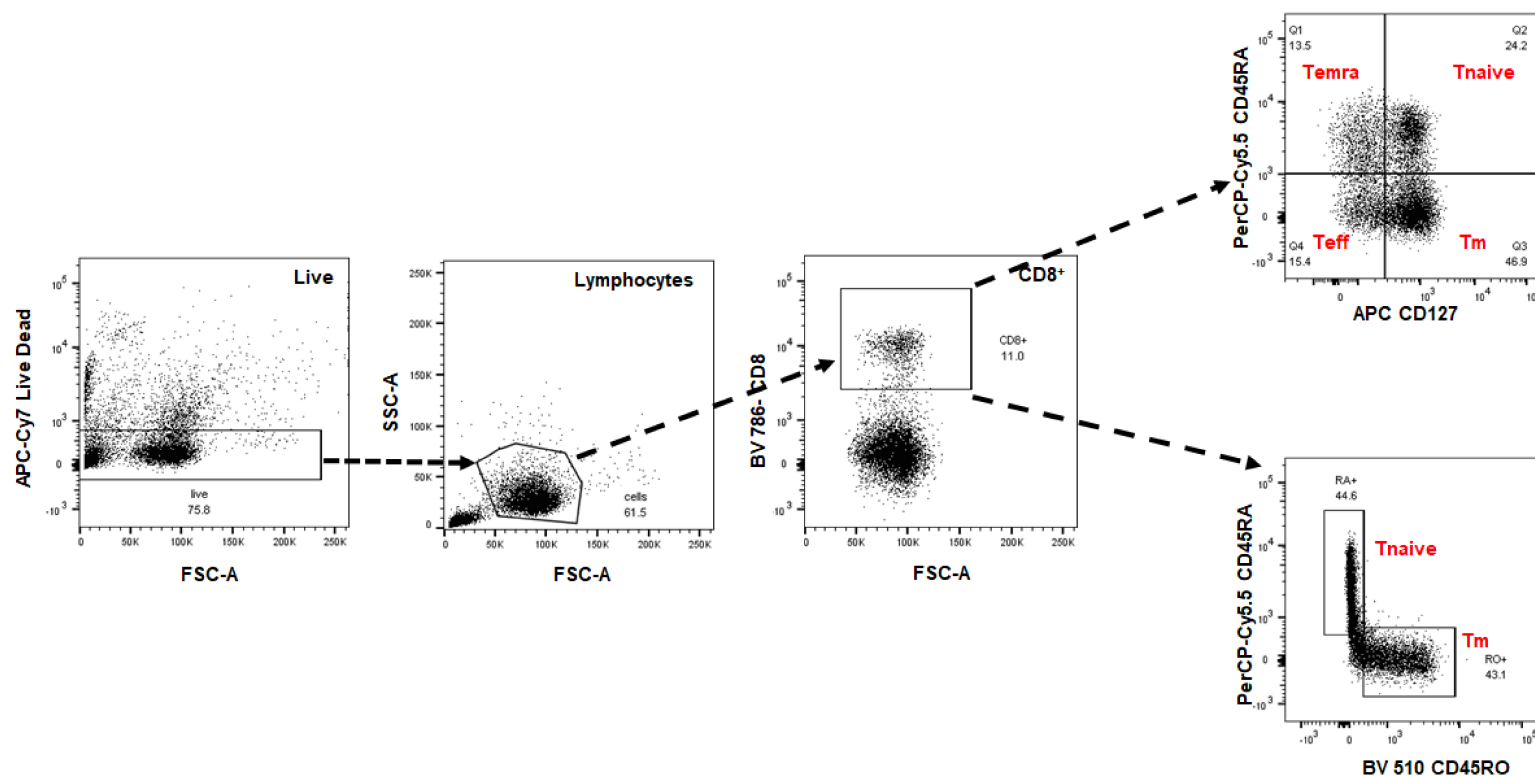

**Supplementary Figure 3. Flow Gating Strategy.** Gating strategy for flow cytometry experiments on PBMCs or TILs isolated from HNSCC patients. Live cells were identified by staining with eFluor780 fixable viability dye. The CD8<sup>+</sup> T cell population was then gated based on CD45RA and CD127 stains to identify the Tnaive, Tm, Teff, Temra populations. Tnaive and Tm populations were also identified based on CD45RA and CD45RO staining respectively. Shown here are representative scatter plots for size and gating of the various T cell subpopulations from PBMCs isolated from a single donor.
