# Supplementary material
Source: HighWire-hosted journal article supplement (https://jitc.bmj.com/content/8/2/e000844)
Supplement: inline-supplementary-material-6 [file inline-supplementary-material-6.pdf]

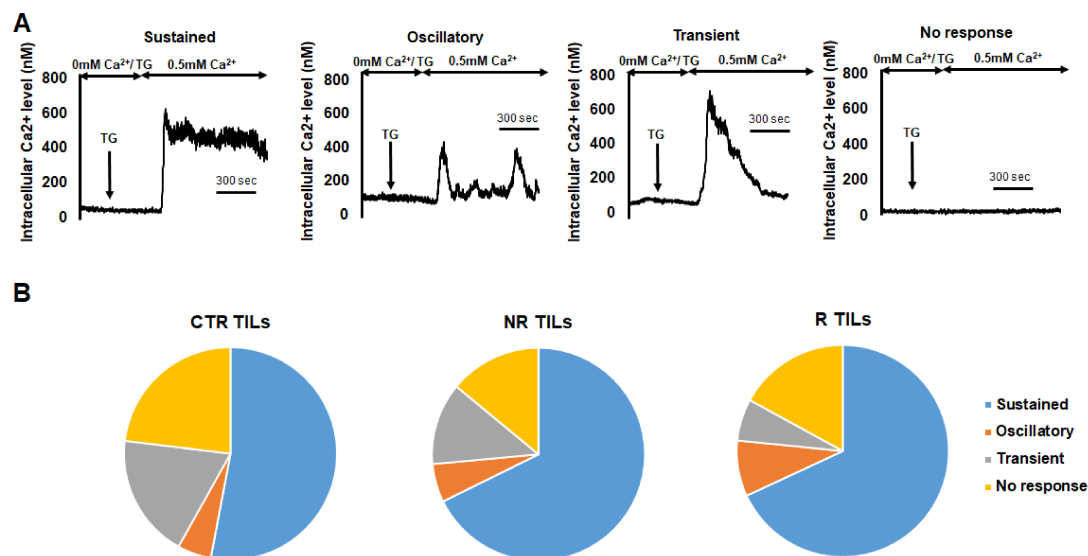

**Supplementary Figure 5. Pembrolizumab influences the shape of  $\text{Ca}^{2+}$  response.** (A) Representative single-cell intracellular  $\text{Ca}^{2+}$  recordings showing the four different responses observed in TILs—sustained, oscillatory, transient, and no response. (B) Pie graphs showing the percentages of sustained, oscillatory, transient, and no response in CTR TILs (53.0%, 5.1%, 18.8%, 23.1%; n = 117 cells from 12 patients), NR TILs (67.7%, 5.8%, 12.4%, 14.0%; n = 257 cells from 10 patients), and R TILs (68.1%, 8.5%, 6.4%, 17.0%; n = 94 cells from 6 patients).
